# Supplementary material for: Tuning the reversibility of hair artificial muscles by disulfide cross-linking for sensors, switches, and soft robotics
Source: Royal Society of Chemistry journal article supplement (doi:10.1039/d1mh00234a), 2021-01-01
Supplement: d1mh00234a1.pdf [file d1mh00234a1.pdf]

1  
2  
3  
4  
5  
6  
7  
8  
  
9  
10  
11  
12  
13  
14  
15

Supporting Information for

**Tuning the Reversibility of Hair Artificial Muscles by Disulfide Cross-Linking for  
Sensors, Switches, and Soft Robotics**

*Xueqi Leng, Xiang Zhou, Jiayu Liu, Yicheng Xiao, Jinkun Sun, Yaowang Li, and Zunfeng Liu\**

**This file includes:**

1. Supplementary Experimental Section (Page S2-S6)
2. Supplementary Figures S1 to S26 (Pages S7–S20)
3. Supplementary Tables S1-S2 (Page S21)
4. Supplementary Movie Captions S1-S5 (Page S22-S23)
5. Supplementary References (Page S24)

## 16 **1. Experimental Section**

### 17 **1.1. Characterization of the torsional and the tensile actuation of the hair muscles**

18 The torsional and the tensile actuations of the hair muscle were characterized by  
19 recording a video using a fast video camera (Nikon Digital Camera D610), and analyzing  
20 the frames from the video. If not specified, the room temperature was 25°C. For the torsional  
21 actuation, the hair muscle was vertically suspended and isobarically loaded with a rectangular  
22 paddle (2.5 mm × 0.5 mm × 0.1 mm) with the mass of 0.013 g. For the actuation, the muscle  
23 fiber that was in the open environmental air with the humidity of 20% was transferred into a  
24 vessel with high humidity and started rotating. After the rotation stopped, it was put back into  
25 the environmental air. Alternatively, the torsional hair muscle was actuated by exposing to the  
26 ultra-sonically generated water fog in the open air. The rotation angle and the rotational speed  
27 were obtained by counting the frames in the video.

28 For the tensile actuation, the hair coil after chemical shape fixing was vertically  
29 suspended free of load and without torsional tethering. Initially the hair coil was put in the  
30 open environmental air with the humidity of 20%, then it was transferred into a vessel with high  
31 humidity and started contracting or elongating. After the hair muscle stopped actuating, it was  
32 put back into the open environmental air. Alternatively, the tensile hair muscle was actuated by  
33 being exposed to the ultra-sonification generated water fog in the open air. The tensile  
34 actuation stroke and the speed were obtained by counting the frames in the video.

### 35 **1.2 Equipments used for characterization of hair fibers**

36 The measurement of the mechanical properties of the hair fibers were carried out on the  
37 mechanical test machine modeled HENGYI 0580 equipped with a 5 N load cell. The gauge  
38 length was 20.0 mm, and the extension rate was 10.0 mm min<sup>-1</sup>. The optical images of the hair  
39 fibers were obtained on a OLYMPUS microscope (model CX31). The SEM of hair fibers was  
40 carried out on a FEI Quanta microscope (QUANTA 200). FTIR spectroscopy of the hair  
41 fibers was carried out on a TENSOR 37 FTIR spectrometer. Raman spectroscopy of the hair  
42 fibers was carried out on a high resolution micro Raman spectrometer (LABRAM HR EVO).  
43 The X-ray diffraction patterns were obtained on an Ultima IV X-ray diffractometer (Cu K $\alpha$   
44 radiation), and the scanning diffraction angle was from 5° to 40°. A Rigaku X-ray  
45 diffractometer (BioSAXS-2000, MicroMax 007 HF) was also used to obtain the two  
46 dimensional X-ray diffraction patterns of the hair fibers. The ambient temperature and the  
47 relative humidity were obtained on a hygrometer (CEM DT-615).

### 48 **1.3. Mechanism of the reversible and irreversible hair fiber artificial muscles**

49 Based on the microstructural evolution of the hair fiber actuators during the twist  
50 insertion, the chemical cross-linking, and the actuation, we proposed a possible mechanism  
51 for the twist-containing hair fiber actuator with the tunable reversible and irreversible  
52 actuations. In order to obtain the tether-free reversible hair muscle, we first need to adequately  
53 cleave the pristine S-S bond to form the -SH bonds, by chemical reduction reaction using the  
54 ammonium thioglycollate solution. Subsequently, adequate oxidation reaction of the above  
55 hair fibers by using the lauramine oxide solution to re-form the new S-S bond. In this way, the  
56 inserted twist can be preserved by formation of the new S-S cross-linking network of the hair  
57 artificial muscle (Figure 2D (i)). During the hygromorph actuation, the newly formed S-S  
58 cross-linking network was not destroyed, and the inserted twist was preserved during the  
59 repeated actuation cycles. This is the reversible hair artificial muscle. If this oxidation  
60 reaction is not adequate enough to produce enough S-S cross-linking points, the cross-linking  
61 network can not be preserved during the hygromorph actuation of the hair fiber. As a result  
62 the preserved twist was released after one cycle of the actuation. This is the irreversible hair  
63 artificial muscle (Figure 2D(ii)).

#### 64 **1.4. Testing processes on the diameter variation of the hair on the humidity adsorption**

65 The changes in the diameter and the length were measured on an optical microscope  
66 by exposing a short segment of the hair fiber (5 cm) to the ultrasonically generated water fog  
67 ( $0.22 \text{ g s}^{-1} \text{ m}^{-2}$ ). Images were taken before and 1 min after water exposure to the hair fiber to  
68 ensure fully water absorption (Fig. 2G). The diameter and the length were measured from the  
69 pictures. The volume can be calculated using the following equation:  $V = \pi(d/2)^2l$ , where  $V$  is  
70 the volume of the hair fiber,  $d$  is the diameter of the hair fiber, and  $l$  is the length of the hair  
71 fiber.

#### 72 **1.5. Applications of the hair fiber artificial muscles**

73 The large tensile stroke of the hygromorph hair coil allowed us to prepare an optically  
74 readable moisture sensor. Ten plies of the twisted hair fibers were folded in the middle point,  
75 then wrapped around a mandrel to form a homochiral coil, and they were soaked in the  
76 ammonium thioglycollate solution (600 mM) for 15 min for the chemical reduction,  
77 followed by soaking in the lauramine oxide solution (130 mM) for 10 min for the chemical  
78 oxidation. The spring index was 2.78, the coil pitch was 3 mm, the twist density was 1000  
79 turns  $\text{m}^{-1}$ , and the ambient humidity was  $\sim 20\%$ . The shape of the hair coil was stabilized  
80 after removing the mandrel, and the fiber artificial muscle showed reversible hygromorph  
81 actuation behavior. Such a homochiral hair fiber artificial muscle can be directly used as an  
82 optically readable moisture sensor, because it exhibited monotonically decreasing length

83 when it is equilibrated in different-humidity environment (Fig. 5D, Fig. S27 and Movie. S1).  
84 A homochiral hair coil was also used as a hygromorph electrical switch for a smart alarm. In  
85 the dry air (20%), the light emitting diodes (LEDs) were connected to the electrical supply  
86 by the copper plate loaded at the end of the hair coil fiber artificial muscle and lightened;  
87 when the hair coil was exposed to the water fog, the electric circuit was disconnected, and  
88 the LEDs went out (Fig. 5E,F and Movie. S2). As another example, two independently  
89 actuated heterochiral coil artificial muscles can be assembled in parallel to control the  
90 forward moving of a soft robot (Fig. 5H and Movie S10).

91 Changing of styles of the hair or the feather has been used as the smart response by the  
92 animals or the birds to communicate with others or protect themselves against the predators.  
93 For example, when the squirrels saw something dangerous, they alerted other squirrels by  
94 wagging their tails; the peacocks attracted the attention of the peahens by fanning out their  
95 tail feathers to show the pretty eye spots, and shaken these feathers when they wanted to  
96 mate; the hedgehogs made their spines immediately brittle up when they felt threatened.  
97 Since 1870s people have marcelled their hair to a wave style by using the hot curling tongs,  
98 and later on the disulfide cross-linking (the cold marcelling technique) was developed to  
99 make the coiled or the flattened hairs by treating the hair with the reducing reagent followed  
100 by using the oxidant. Up till now, the marcelling techniques were not able to produce hair  
101 styles that can reversibly change the shape in response to the environmental changes.

102 Here we developed a smart hair style that can reversibly respond to humidity by this  
103 twist-assisted disulfide cross-linking, which was realized by twist insertion into hair fibers  
104 followed by reduction and oxidation. Then hair fiber artificial muscle prepared in a similar  
105 way as the previous paragraph (without folding in the middle after twist insertion) were  
106 attached on the head of a doll in parallel to form a moisture-sensitive smart hair style. In  
107 detail, ten plies of 20-cm-long, 95- $\mu\text{m}$ -diameter adult female hair fibers were twisted until  
108 just before coiling (2000 turns  $\text{m}^{-1}$ ) at an isobaric load of 2.1 MPa. Then it was wrapped  
109 around a 3-mm-diameter mandrel to form a homochiral coil with the spring index of 3.4 and  
110 the coil pitch of 3 mm. Then the hair coil on the mandrel was both end tethered and soaked  
111 in the ammonium thioglycollate solution (600 mM) for 15 min for reduction, followed by  
112 soaking in the lauramine oxide solution (130 mM) for 10 min for oxidation to obtain the  
113 reversible hygromorph artificial muscle. By spraying the water droplets on the hair coils,  
114 they shrank by  $\sim 80\%$  in 2.5 min, and upon water evaporation into air they returned back to  
115 the initial length (Fig. 5G, Movie. S3). Such a smart hair style may be used in the  
116 environmental adaptive cases that got short to facilitate sweat evaporation from the body.

117 **1.6. Calculation of the extent of the reformed S-S bond by oxidation of the chemically**  
118 **reduced –SH bond.**

119 Figure S2 shows the Raman spectra of the hair for the different chemical reduction time.  
120 The peak at 580 cm<sup>-1</sup> for the untreated hair fiber corresponded to the S-S bond, and this peak  
121 red shifted and the intensity decreased due to the breakage of the S-S bond to form the –SH  
122 bond during the chemical reduction; oxidation of the chemically reduced hair fiber resulted in  
123 the reversible blue shift of this peak. Because oxidation of the pristine hair fiber did not cause  
124 noticeable change of this peak (data not shown), we considered the S-S bond that was able to  
125 be chemically reduced to be 100%. We then quantitatively calculated the percentage of the  
126 reformed S-S bond by dividing the increase for the integrated area for the peak between 500  
127 and 600 cm<sup>-1</sup> during further oxidation of the hair fiber with the reduction time of 15 min.  
128 Figure S3A shows the dependence of the percentage of the reformed S-S bond as a function  
129 of the oxidation time for the chemically reduced hair fiber. The hair fiber with the oxidation  
130 time of 2 and 10 min showed the fully irreversible and the fully reversible actuations,  
131 respectively (Fig. S3B).

132 **1.7. Discription of the Equations 2 to 4.**

133 The torsional rotation angle can be calculated from the inserted twist and the change in  
134 fiber diameter, which was derived from the reference 20 (*Science* 2014, 343, 6173) and our  
135 previous work (*Adv. Funct. Mater.*, 2019, 29, 1808241). We have added this information into  
136 the revised manuscript, and give brief introduction of the equations 2 to 4. The detailed  
137 information about these equations from the reference 20 is shown below.

138 The description of the equation 2 is as follows (from *Science* 2014, 343, 6173): “For a  
139 twisted fiber until just before coiling, initially parallel fiber is twisted into helices that have a  
140 bias angle ( $\alpha$ ) relative to the fiber direction of approximately  $\alpha = \tan^{-1}(2\pi rT)$ , where  $r$  is the  
141 radial distance from the fiber center and  $T$  is the amount of twist inserted per initial fiber  
142 length.<sup>1</sup> The cross-section of pristine hair fiber is approximated to a circle, and the diameter is  
143 twice the radius ( $d=2r$ ), so the equation can be summed up as  $\alpha = \tan^{-1}(\pi d_e T)$ .”

144 For the equation 3, because of the hair fiber could get flattened during twist insertion, the  
145 original diameter is not suitable for the twisted hair fiber. But the area of the cross-section  
146 would not change before and after twist insertion, so we use this condition to build an  
147 equation to get the equivalent fiber diameter ( $d_e$ ). This equivalent fiber diameter was  
148 approximated from the following equation:  $\pi(d_e/2)^2 = d_s d_l$ , where  $d_s$  and  $d_l$  were the lengths of  
149 the short side and the long side across the cross-section of the flattened hair fiber, respectively,  
150 by roughly approximating the cross-section of the flattened hair was rectangular.

151 The equations 4 was derived from the reference 2 (*Adv. Funct. Mater.*, 2019, 29(18),  
152 1808241). When applied to a twisted hair fiber, this model predicts that the relative change in

153 the inserted twist is given by 
$$\frac{\Delta n}{n} = \frac{\frac{\Delta \lambda}{\lambda}}{\cos^2 \alpha_f} - \frac{\Delta d}{d} - (\Delta l/l) \tan^2 \alpha_f$$
, where  $n$  is the inserted twist,  $\lambda$  is  
154 the length of a helical fiber in the twisted fiber,  $d$  is the initial diameter of the twisted fiber  
155 before actuation,  $l$  is the axial length of the twisted fiber, and  $\Delta$  indicates changes in these  
156 parameters during actuation. According to above Equation, expansion in the fiber diameter  
157 due to absorption of water leads to torsional actuation by yarn untwist. For this hair artificial  
158 muscle,  $\Delta \lambda/\lambda$  and  $\Delta l/l$  are relatively small because of the high fiber modulus in their axial  
159 directions. The torsional actuation is thus approximated as  $\Delta T = -T(\Delta d_e/d_e)$ , where  $T$  is the  
160 initially inserted twist  $n$  when normalized to initial fiber length before twist insertion and  $\Delta T$   
161 is the change in  $T$  during actuation,  $d_e$  was the equivalent fiber diameter as the hair got  
162 flattened during twist insertion.

163

164

166 2. Supplementary Figures

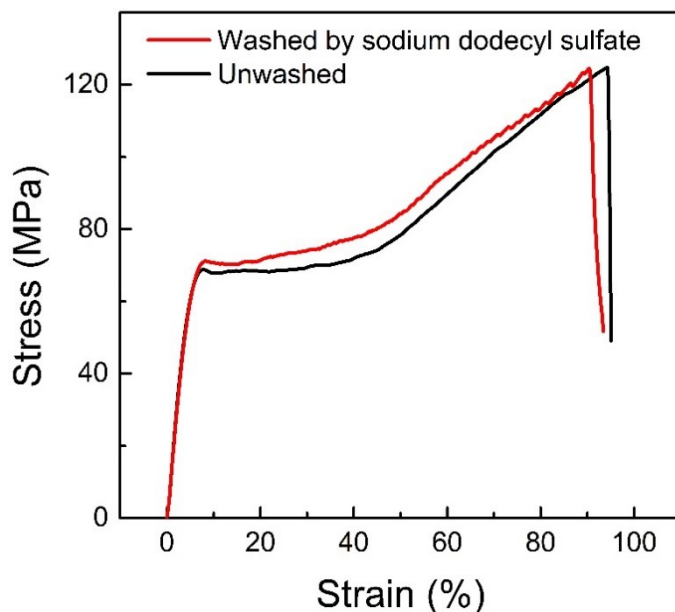

167

168 **Figure S1.** Stress-strain curves for an as obtained human hair fiber and the hair fiber  
169 after washing with the sodium dodecyl sulfate solution (0.5 wt%) and air dried. The  
170 relative humidity of ambient air was ~20%. Negligible change in the mechanical properties  
171 was observed for the hair fibers before and after washing.

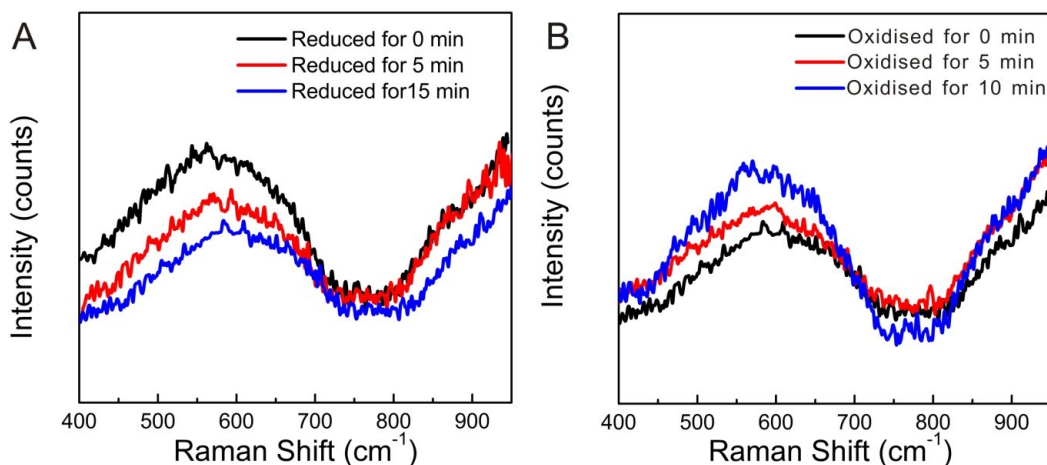

172

173 **Figure S2.** Raman spectra of the hair fibers by soaking the hair fiber in the ammonium  
174 thioglycollate solution (600 mM) for different time for the chemical reduction (A), and for the  
175 hair fibers with 15 min reduction time that were further soaked in the lauramine oxide  
176 solution (130 mM) for different oxidation time (B).

177

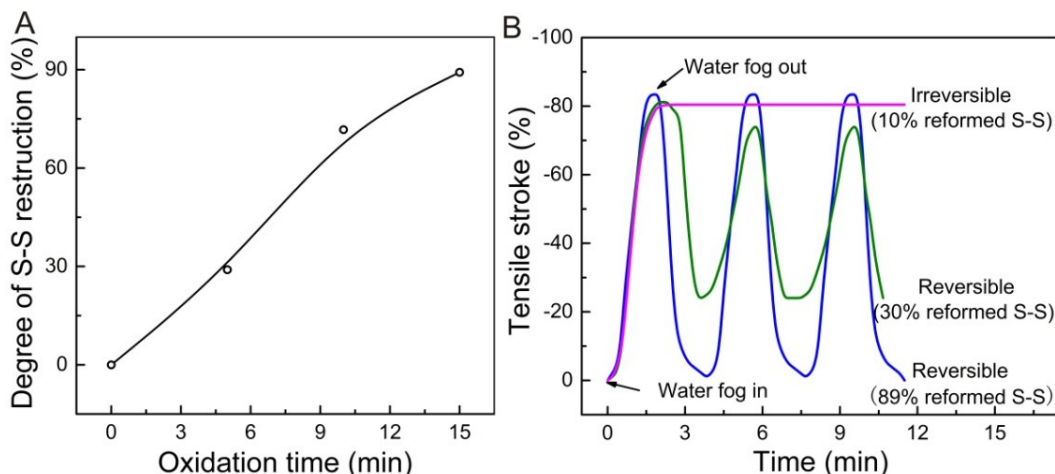

178  
 179 **Figure S3.** Degree of the S-S reconstruction for the hair fibers with the 15 min reduction time  
 180 that were further soaked in the lauramine oxide solution (130 mM) for different oxidation  
 181 time (A). Tensile stroke as a function of time for the typical irreversible actuation, the  
 182 reversible actuation with lower degree of the S-S reconstruction (30%) and the reversible  
 183 actuation with high degree of the S-S reconstruction tensile hair artificial muscles (89%) (B).  
 184

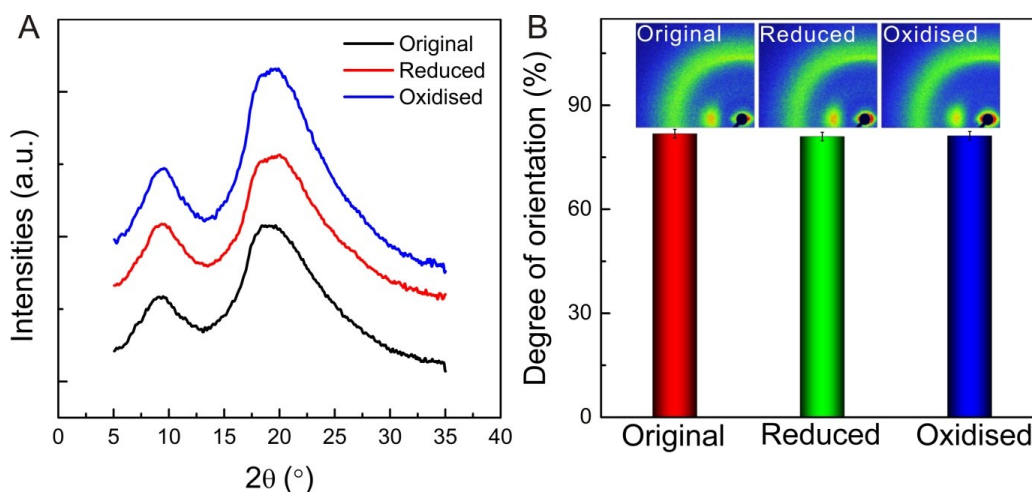

185  
 186 **Figure S4.** The integrated intensity curves (A) and the degree of orientation of the 2D  
 187 WAXS X-Ray diffraction patterns (B) for the original hair fiber, the hair fiber after the  
 188 chemical reduction, and this fiber after the chemical oxidation. The hair fiber was soaked  
 189 in the ammonium thioglycollate solution (600 mM) for 15 min for chemical reduction, and  
 190 this hair fiber was soaked in the lauramine oxide solution (130 mM) for 10 min for chemical  
 191 oxidation.



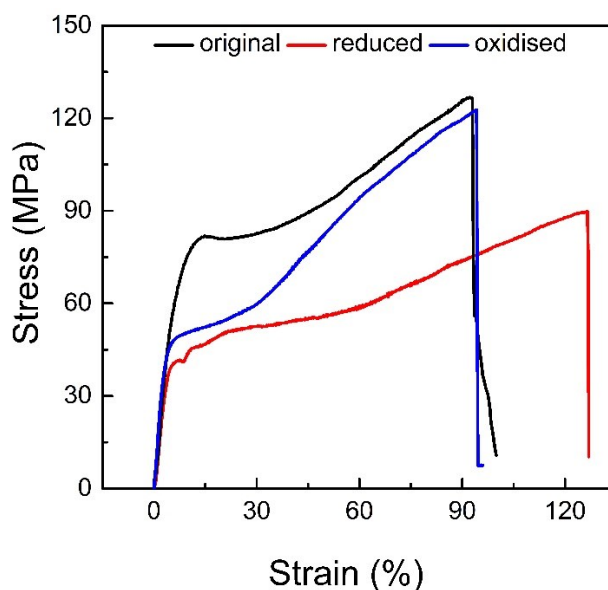

192  
 193 **Figure S5.** Stress-strain curves for the pristine hair fiber, the hair fiber after chemical  
 194 reduction, and this fiber after chemical oxidation. The hair fiber was soaked in the  
 195 ammonium thioglycollate solution (600 mM) for 15 min for chemical reduction, and this hair  
 196 fiber was soaked in the lauramine oxide solution (130 mM) for 10 min for chemical oxidation.

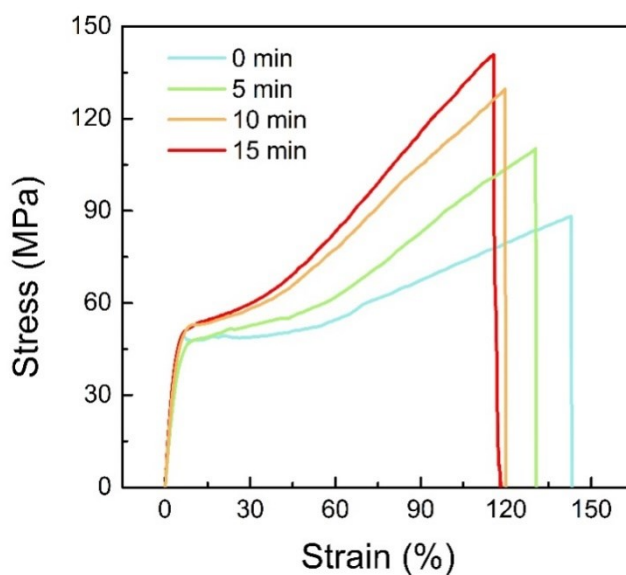

197  
 198 **Figure S6.** Stress-strain curves of the human hair fiber that was soaked in the ammonium  
 199 thioglycollate solution (600 mM) for 20 min for chemical reduction, followed by soaking in  
 200 the lauramine oxide solution (130 mM) for different time for chemical oxidation. The relative  
 201 humidity of ambient air was ~20%.

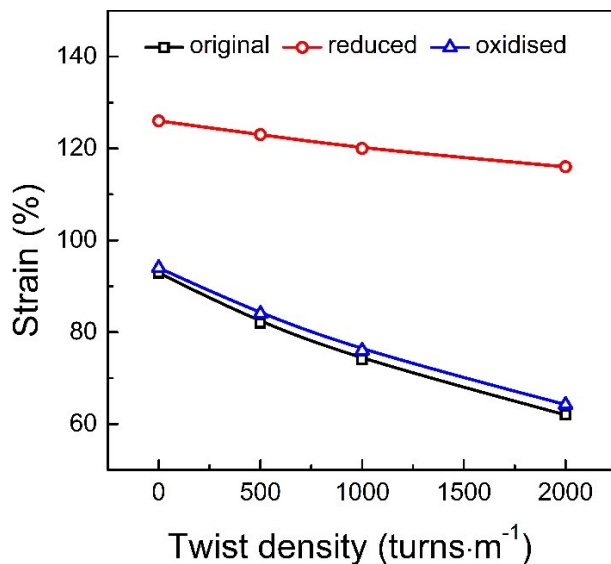

202

203 **Figure S7. Mechanical properties of the hair fibers treated with the chemical reduction,**  
 204 **the chemical oxidation, and the twist insertion.** Strain at break as a function of the twist  
 205 density for the pristine hair fiber, the hair fiber after the chemical reduction, and the fiber after  
 206 sequential chemical reduction and oxidation. For chemical reduction the hair fiber was soaked  
 207 in the ammonium thioglycollate solution (600 mM) and for chemical oxidation the hair fiber  
 208 was soaked in the lauramine oxide solution (130 mM). The ambient humidity was 20%, and  
 209 the strain rate was 0.83% s<sup>-1</sup>.

210

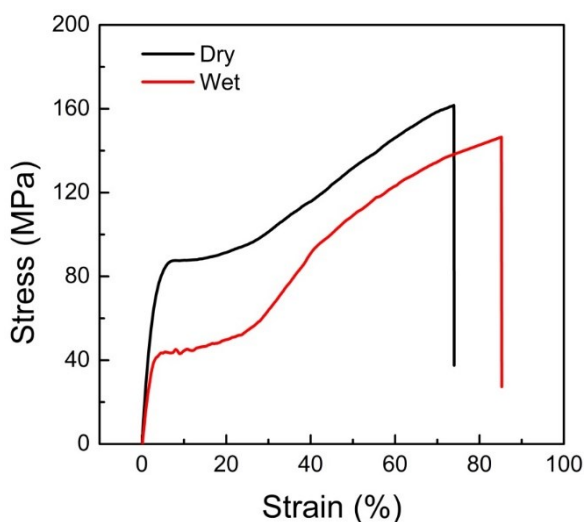

211

212 **Figure S8.** Stress-strain curves for the pristine dried hair fiber and this hair fiber that was  
 213 soaked in water for 1 min. The ambient humidity was 20%, and strain rate was 0.83% s<sup>-1</sup>.

214

215

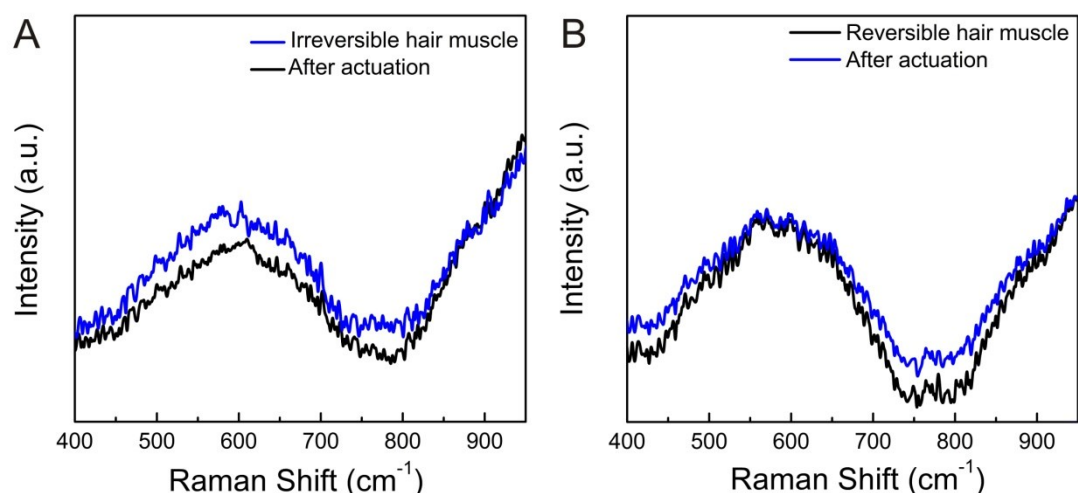

216

217 **Figure S9. Raman spectra of the torsional hair muscles with (A) the irreversible and (B)**  
 218 **the reversible actuation before and after the moisture-driven actuation on exposure to**  
 219 **the water fog.** For (A) the muscle was prepared by soaking the twisted human hair (1500  
 220 turns  $m^{-1}$ ) in the ammonium thioglycollate solution (600 mM) for 15 min for chemical  
 221 reduction, and further soaked in the lauramine oxide solution (130 mM) for 2 min for  
 222 chemical oxidation. The ambient air humidity was 20%. For (B) the muscle was prepared by  
 223 soaking the twisted human hair (1500 turns  $m^{-1}$ ) in the ammonium thioglycollate solution  
 224 (600 mM) for 15 min for chemical reduction, and further soaked in the lauramine oxide  
 225 solution (130 mM) for 10 min for chemical oxidation.

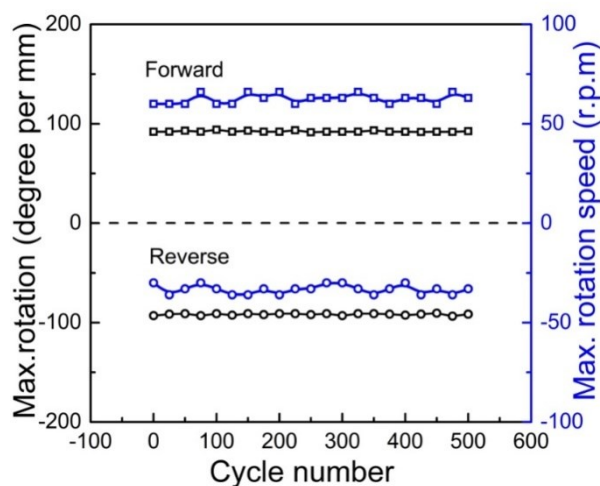

226

227 **Figure S10. The maximum rotation angle and the maximum rotational speed as a**  
 228 **function of the actuation cycles for the reversible hair muscle on exposure to the water**  
 229 **fog.** The hair muscle were soaked in the ammonium thioglycollate solution (600 mM) for 15  
 230 min for reduction, followed by soaking in the lauramine oxide solution (130 mM) for 10 min  
 231 for oxidation to produce reversible muscle; the twist density was 1500 turns  $m^{-1}$ .

232

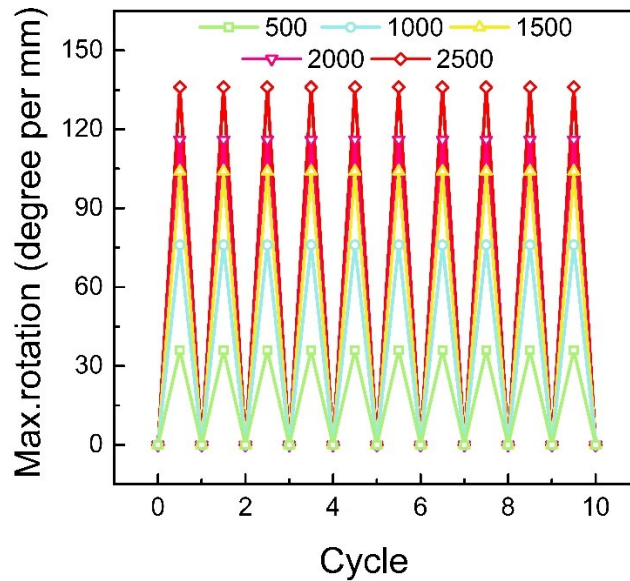

233

234 **Figure S11. The maximum rotation angle for tens cycles of actuation for the torsional**  
 235 **hair muscle with different twist density on exposure to the water fog.** The torsional hair  
 236 muscle was prepared by soaking the twisted hair fiber in the ammonium thioglycollate  
 237 solution (600 mM) for 15 min for chemical reduction, followed by chemical oxidation in the  
 238 lauramine oxide solution (130 mM) for 10 min, to give a reversible torsional muscle. The unit  
 239 of the twist density in the figure was turns  $m^{-1}$ . The ambient humidity was 20%, and the flux  
 240 of the water fog was  $0.22 \text{ g s}^{-1} m^{-1}$ .

241

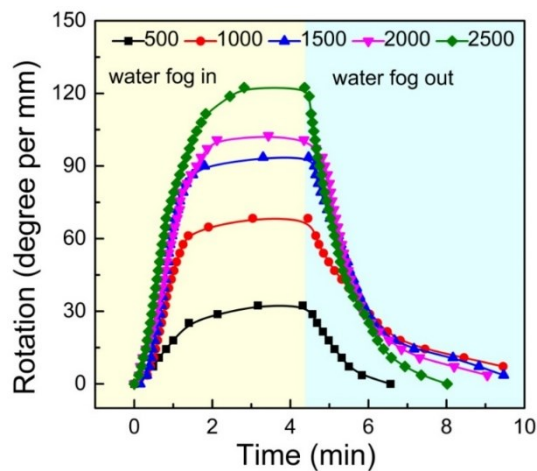

242

243 **Figure S12. Rotation angle as a function of time for the torsional hair muscle with**  
 244 **different twist density during exposure to the water fog and removal of the water fog.**  
 245 The torsional hair muscle was prepared by soaking the twisted hair fiber in the ammonium  
 246 thioglycollate solution (600 mM) for 15 min for chemical reduction, followed chemical  
 247 oxidation in the lauramine oxide solution (130 mM) for 10 min, to give a reversible torsional  
 248 muscle. The unit of the twist density in the figure was turns  $m^{-1}$ . During actuation, the ambient  
 249 humidity was 20%, and the flux of the water fog was  $0.22 \text{ g s}^{-1} m^{-1}$ .

250

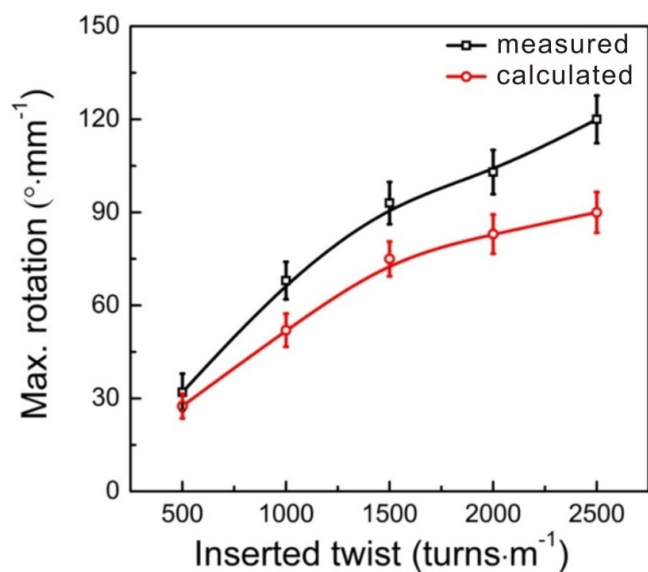

251

252 **Figure S13. The experimentally measured and the theoretically calculated maximum**  
 253 **rotation angles as a function of the inserted twist for the torsional hair muscle on**  
 254 **exposure to the water fog.** The torsional hair muscle was prepared by soaking the twisted  
 255 hair fiber in the ammonium thioglycollate solution for 15 min for chemical reduction,  
 256 followed by chemical oxidation in the lauramine oxide solution for 10 min, to give a  
 257 reversible torsional muscle. During actuation, the ambient humidity was 20%, and the flux of  
 258 the water fog was  $0.22 \text{ g s}^{-1} \text{ m}^{-1}$ .

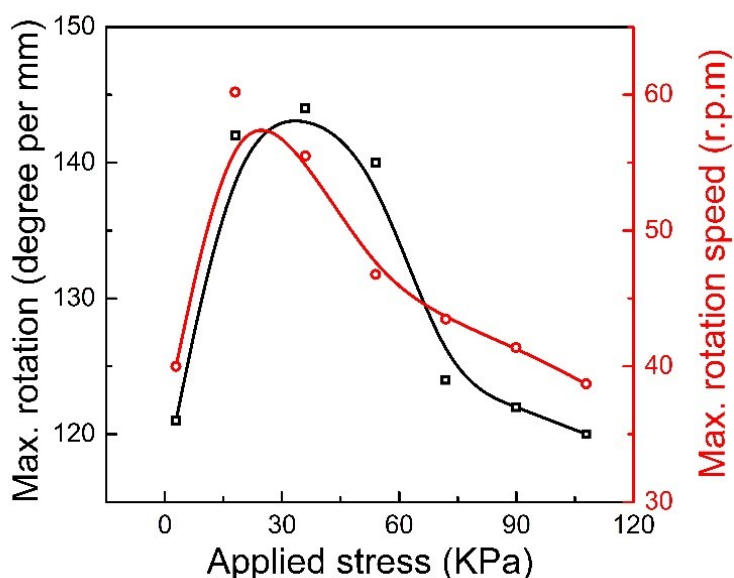

259

260 **Figure S14. The maximum rotation angle and the maximum rotational speed as a**  
 261 **function of the applied stress for the torsional hair muscle on exposure to the water fog.**  
 262 The torsional hair muscle was prepared by soaking the twisted hair fiber in the ammonium  
 263 thioglycollate solution for 15 min for chemical reduction, followed by chemical oxidation in  
 264 the lauramine oxide solution for 10 min, to give a reversible torsional muscle. During  
 265 actuation, the ambient humidity was 20%, and the flux of water fog was  $0.22 \text{ g s}^{-1} \text{ m}^{-1}$ .

266

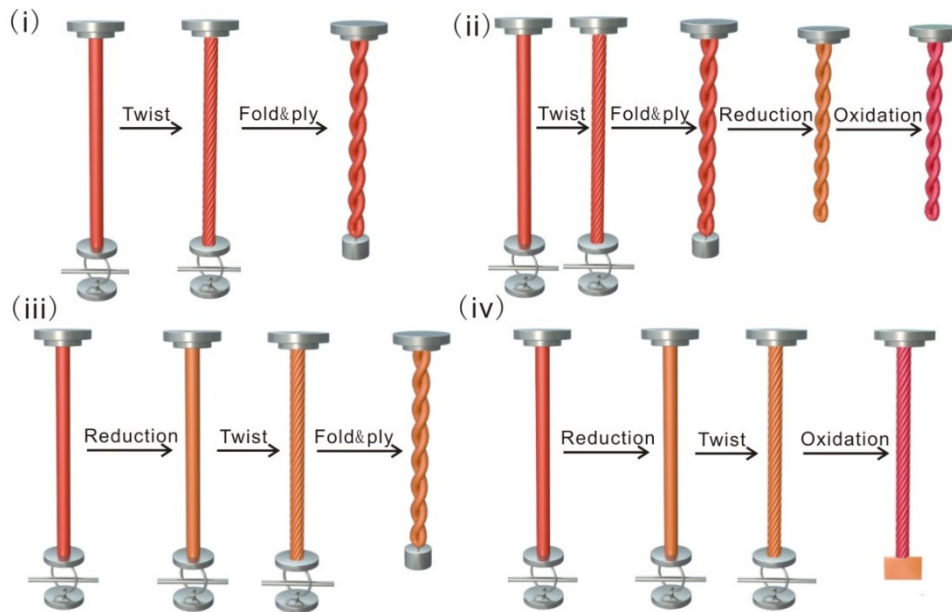

268

269 **Figure S15. Schematic illustration of the different ways to prepare the torsional hair**  
 270 **muscle.** (i) Twist insertion into the hair fiber, followed by folding the fiber in the middle point  
 271 to form a two-ply structure (abbreviated as twisted and two ply); (ii) Folding the twisted hair  
 272 fiber in the middle point to form a two-ply structure, chemical reduction in the ammonium  
 273 thioglycollate solution, and oxidation in the lauramine oxide solution (abbreviated as twisted,  
 274 two ply, reduced and oxidized); (iii) Chemical reduction of the hair fiber in the ammonium  
 275 thioglycollate solution, followed by twist insertion and folding in the middle point to form a  
 276 two-ply structure (abbreviated as reduced, twisted, and two ply); (iv) Chemical reduction of  
 277 the hair fiber in the ammonium thioglycollate solution, followed by twist insertion, and  
 278 chemical oxidation of the hair fiber in the lauramine oxide solution (abbreviated as reduced,  
 279 twisted, and oxidized).

280

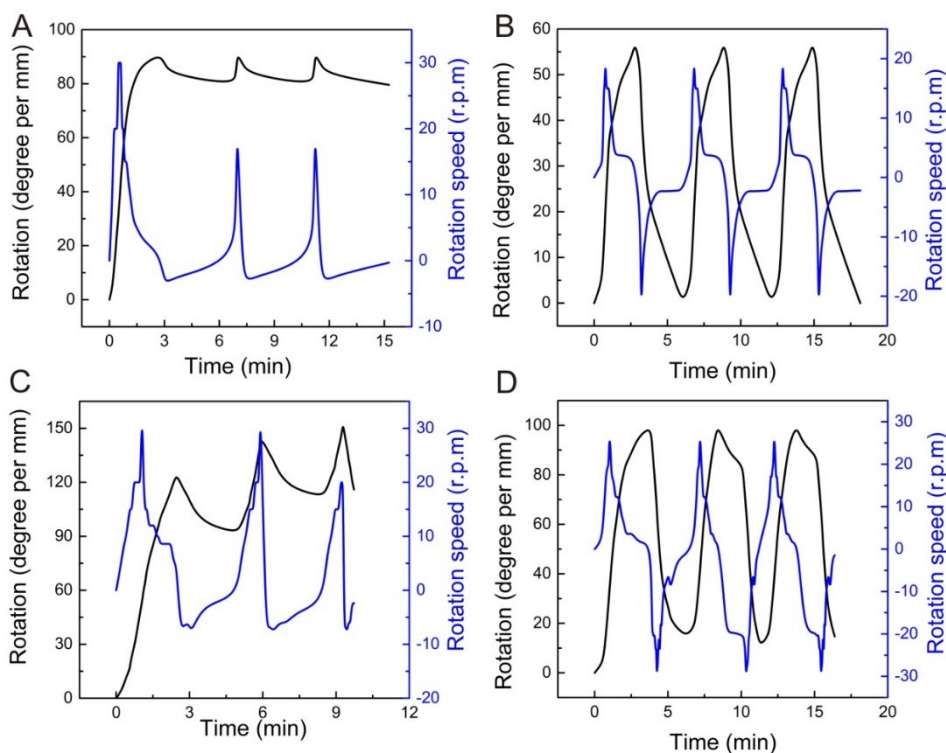

281

282 **Figure S16. The rotation angle and the rotational speed on exposure to the water fog for**  
 283 **the torsional hair muscles prepared by different methods in Fig. S17. (A) Twisted and**  
 284 **two ply. (B) Twisted, two ply, reduced and oxidized. (C) Reduced, twisted, and two ply. (D)**  
 285 **Reduced, twisted, and oxidized. For (A) to (D), the twist density was  $1500 \text{ turns m}^{-1}$ , the**  
 286 **chemical reduction was done by soaking the hair fiber in the ammonium thioglycollate**  
 287 **solution (600 mM) for 15 min, and the chemical oxidation was done by soaking the hair fiber**  
 288 **in the lauramine oxide solution (130 mM) for 10 min. The ambient humidity was 20%, and the**  
 289 **flux of the water fog was  $0.22 \text{ g s}^{-1} \text{ m}^{-1}$ .**

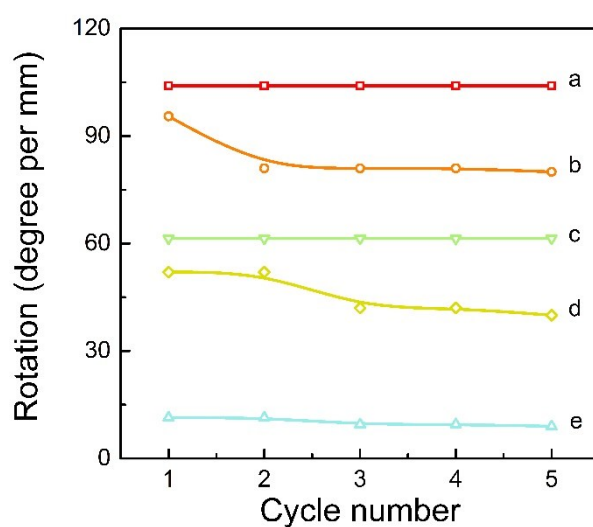

290

291 **Figure S17. The rotation angle on exposure to the water fog for the torsional hair muscles**  
 292 **prepared by different methods: (a) Twisted, reduced, and oxidized; (b) Reduced, twisted, and**

293 oxidized; (c) Twisted, two ply, reduced and oxidized; (d) Reduced, twisted, and two ply; (e)  
 294 Twisted and two ply.  
 295

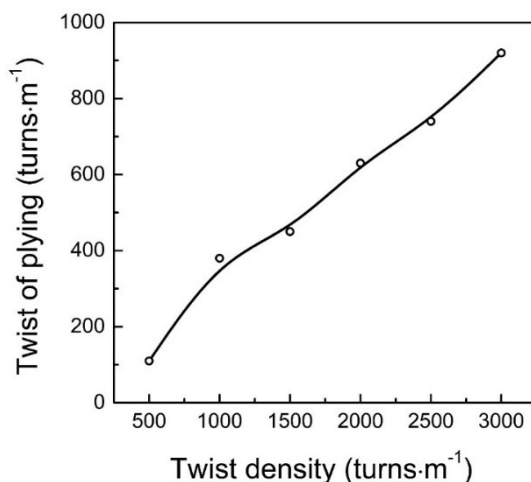

296  
 297 **Figure S18.** Twist of plying as a function of the twist density of the hair fiber, where the  
 298 twisted fiber was folded in the middle point to form a two-ply structure.

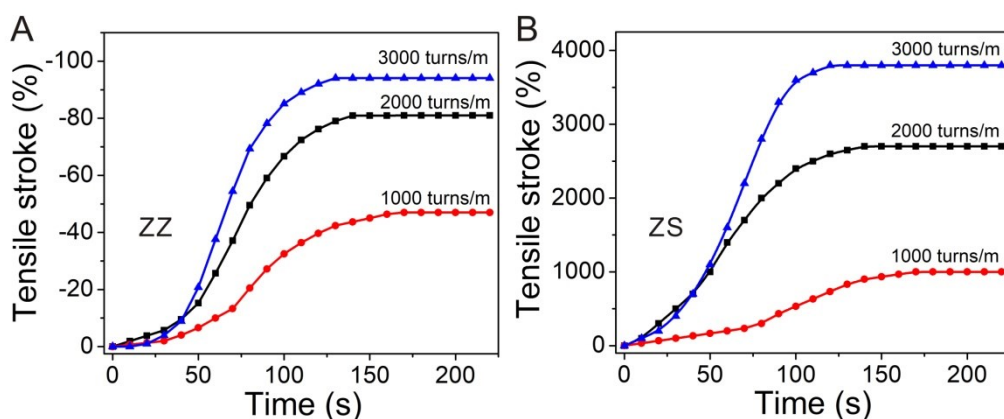

299  
 300 **Figure S19.** Tensile stroke as a function of time for (A) the homochiral and (B) the  
 301 heterochiral hair coils with different inserted twist on exposure to the water fog. For (A)  
 302 and (B), the hair coils were soaked in the ammonium thioglycollate solution (600 mM) for 15  
 303 min for reduction, followed by soaking in the lauramine oxide solution (130 mM) for 10 min  
 304 for oxidation; the pitch for the homochiral coil was 3 mm, and the coils contacted with each  
 305 other for the heterochiral coil. The spring index for (A) and (B) was 15.8. The flux of water  
 306 fog was  $0.22 \text{ g s}^{-1} \text{ m}^{-1}$ .  
 307



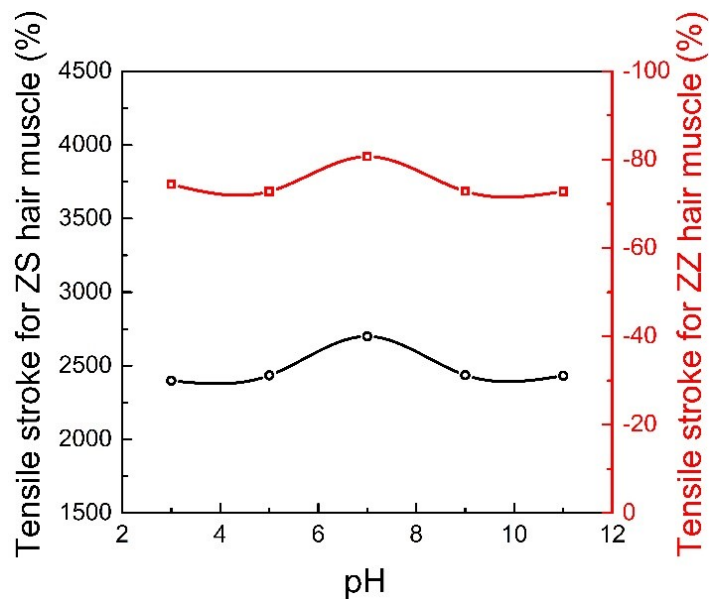

308

309 **Figure S20. Tensile stroke for the homochiral and the heterochiral hair coils on**  
 310 **exposure to the water fog with different pH values.** The hair coil was soaked in the  
 311 ammonium thioglycollate solution (600 mM) for 15 min for reduction, followed by soaking in  
 312 the lauramine oxide solution (130 mM) for 10 min for oxidation; the twist density was 2000  
 313 turns  $m^{-1}$ , the spring index was 15.8, the coil pitch for the homochiral coil was 3 mm and the  
 314 coils contacted each other for the heterochiral coils, and the flux of the water fog was  $0.22 \text{ g s}^{-1}$   
 315  $m^{-1}$ .

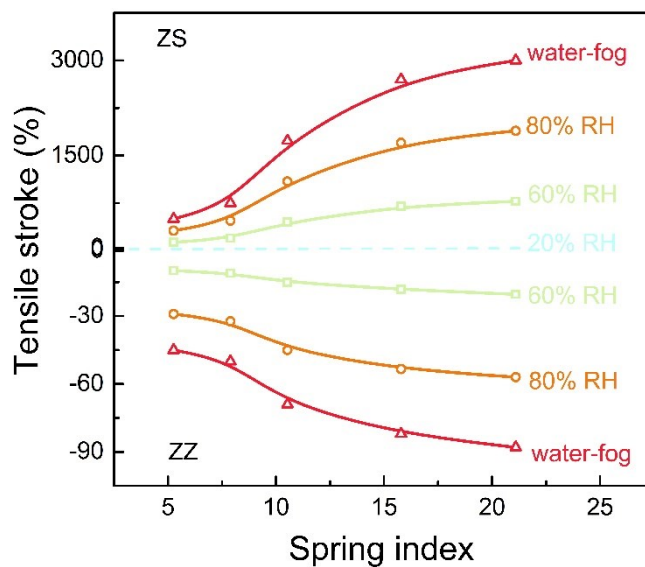

316

317 **Figure S21. Tensile stroke as a function of the spring index for the homochiral and the**  
 318 **heterochiral hair coils on exposure to different humidity air and the water fog.**

319

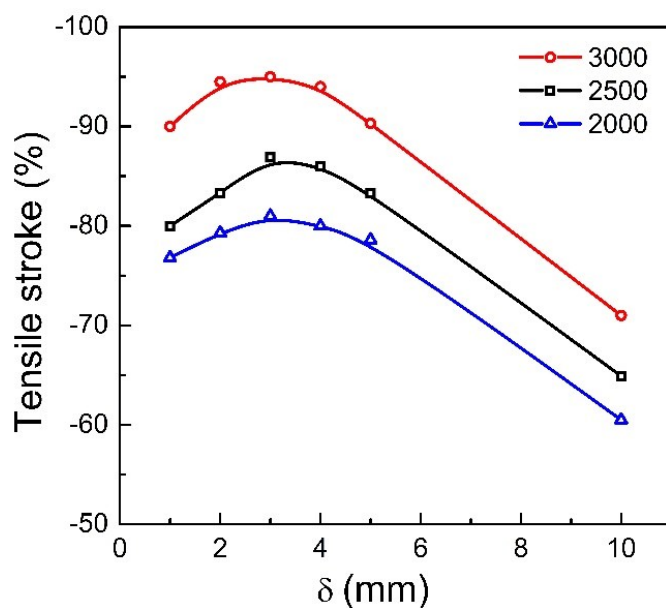

320

321 **Figure S22. Tensile stroke as a function of the coil pitch for the homochiral hair coils**  
 322 **with different twist density on exposure to the water fog.** The hair coils were soaked in the  
 323 ammonium thioglycollate solution (600 mM) for 15 min for reduction, followed by soaking in  
 324 the lauramine oxide solution (130 mM) for 10 min for oxidation; the spring index was 15.8,  
 325 and the flux of the water fog was  $0.22 \text{ g s}^{-1} \text{ m}^{-1}$ .

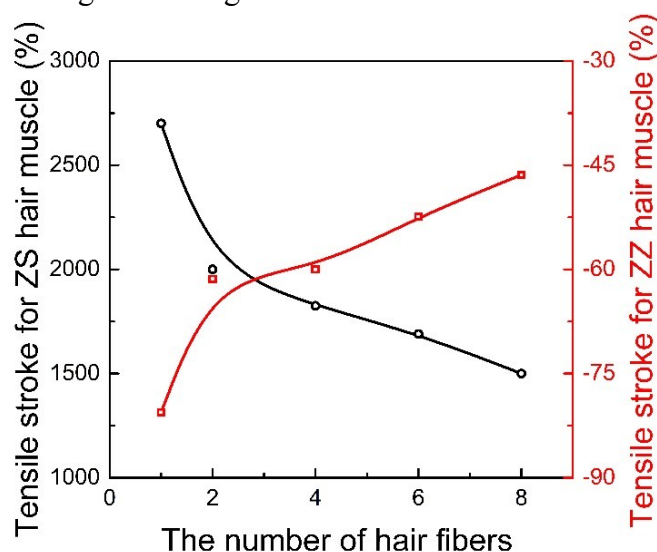

326

327 **Figure S23. Tensile stroke for the homochiral and the heterochiral hair coils with**  
 328 **different number of plies of the hair fibers on exposure to the water fog.** The hair coil was  
 329 soaked in the ammonium thioglycollate solution (600 mM) for 15 min for reduction, followed  
 330 by soaking in the lauramine oxide solution (130 mM) for 10 min for oxidation; the twist  
 331 density was  $2000 \text{ turns m}^{-1}$ , the spring index was 15.8, the coil pitch for the homochiral coil  
 332 was 3 mm and the coils contacted each other for the heterochiral coils, and the flux of the  
 333 water fog was  $0.22 \text{ g s}^{-1} \text{ m}^{-1}$ .

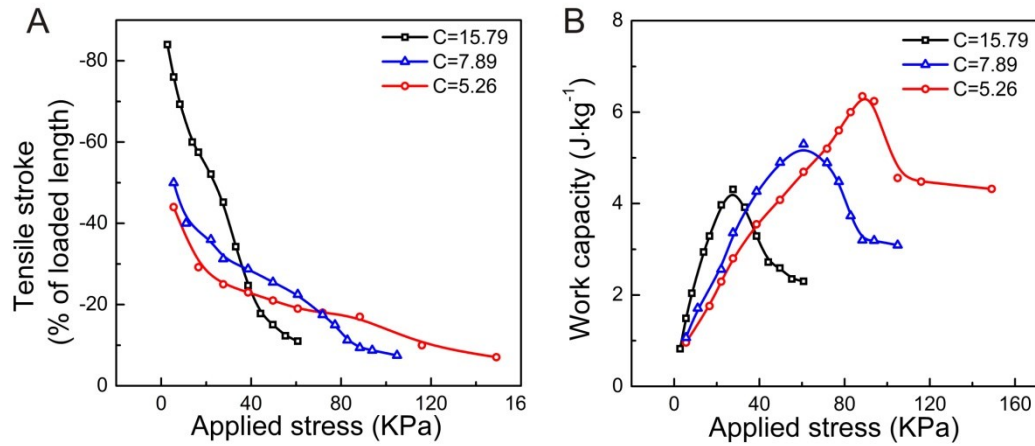

334

335 **Figure S24c. (A) Tensile stroke and (B) the work capacity as a function of the applied**  
 336 **stress for the homochiral hair coils with different spring index on exposure to the water**  
 337 **fog.** The hair coils were soaked in the ammonium thioglycollate solution (600 mM) for 15  
 338 min for reduction, followed by soaking in the lauramine oxide solution (130 mM) for 10 min  
 339 for oxidation; the twist density was 2000 turns m<sup>-1</sup>, the coil pitch was 3 mm, and the flux of  
 340 the water fog was 0.22 g s<sup>-1</sup> m<sup>-1</sup>.

341

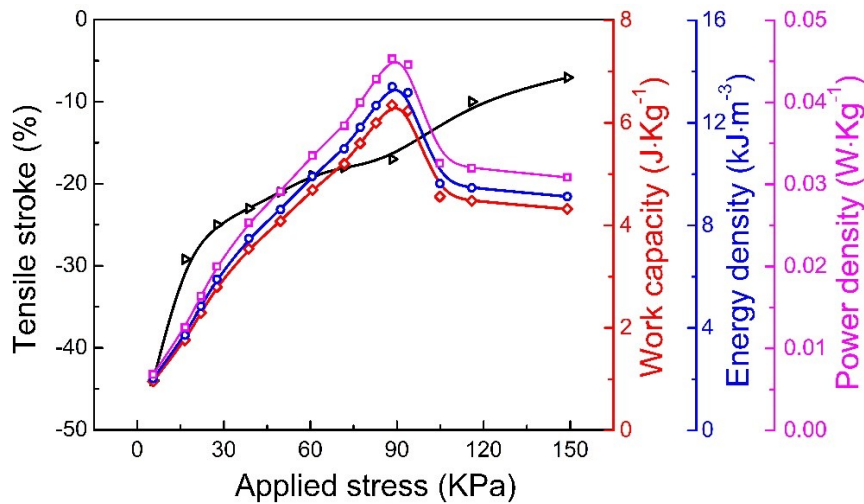

342

343 **Figure S25. The tensile stroke, the work capacity, the energy density and the power**  
 344 **density as a function of the applied stress for the homochiral hair coil on exposure to the**  
 345 **water fog.** The hair coil was soaked in the ammonium thioglycollate solution (600 mM) for  
 346 15 min for reduction, followed by soaking in the lauramine oxide solution (130 mM) for 10  
 347 min for oxidation; the twist density was 2000 turns m<sup>-1</sup>, the spring index was 5.3, the coil  
 348 pitch was 3 mm, and the flux of the water fog was 0.22 g s<sup>-1</sup> m<sup>-1</sup>.

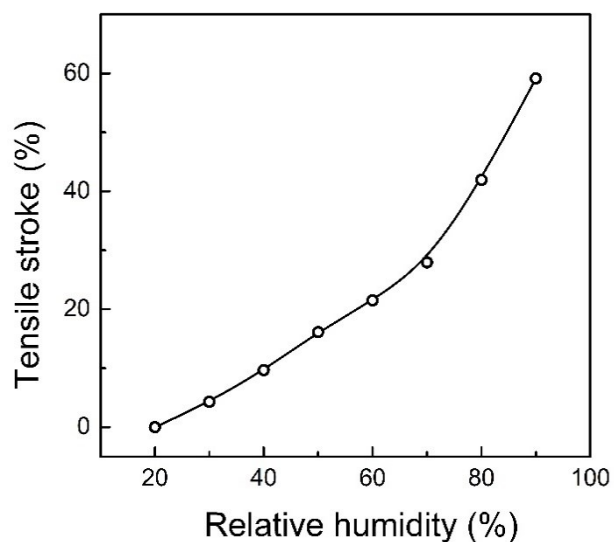

349

350 **Figure S26. The tensile stroke as a function of the relative humidity for the moisture**  
351 **sensor fabricated by the homochiral hair coil.** The coil were soaked in the ammonium  
352 thioglycollate solution (600 mM) for 15 min for chemical reduction, followed by soaking in  
353 the lauramine oxide solution (130 mM) for 10 min for chemical oxidation. The spring index  
354 was 2.8, the coil pitch was 3 mm, the twist density was 1000 turns  $m^{-1}$ , and the ambient  
355 humidity was ~20%.

357 **3. Supplementary Tables**

358 **Table S1.** Comparison of the torsional actuation properties of the hygromorph torsional fiber  
 359 muscles, which were experimentally measured in this work.

| Fiber materials | Twist density<br>(turns mm <sup>-1</sup> ) | Diameter<br>(μm) | Rotation angle<br>(° mm <sup>-1</sup> ) | Rotation<br>angle × Diameter<br>(°) |
|-----------------|--------------------------------------------|------------------|-----------------------------------------|-------------------------------------|
| Human hair      | 2.5                                        | 95               | 136                                     | 12.9                                |
| Silkworm silk   | 2.5                                        | 19               | 247                                     | 4.7                                 |
| Cotton          | 2.5                                        | 16.6             | 199                                     | 3.3                                 |
| CNT yarn        | 2.5                                        | 40               | 61.3                                    | 2.5                                 |
| Wool            | 2.5                                        | 60               | 149                                     | 8.9                                 |

360 **Table S2.** Comparison of the tensile actuation stroke and the response rate of the hygromorph  
 361 tensile artificial muscles in this work with literature results.

| Fiber materials                        | Reversible or irreversible | Maximum<br>contractile stroke<br>(%) | Response rate (% s <sup>-1</sup> ) |
|----------------------------------------|----------------------------|--------------------------------------|------------------------------------|
| Human hair<br>(This work)              | Both                       | 94                                   | 0.63                               |
| Graphene oxide<br>fiber <sup>[3]</sup> | Reversible                 | 5                                    | 0.5                                |
| CNT/silk fiber <sup>[4]</sup>          | Reversible                 | 0.4                                  | 0.0017                             |
| Silkworm <sup>[2]</sup>                | Reversible                 | 70                                   | 1.04                               |
| NT/hydrogel<br>muscle <sup>[5]</sup>   | Reversible                 | 78                                   | 0.072                              |
| Spider silk <sup>[6]</sup>             | Reversible                 | 0.5                                  | 0.025                              |

362

363

365 **4. Movie Captions:**

366 **Movie S1. A hygrometer indicating changes in the ambient humidity.**

367 A homochiral hair muscle can be directly used as an optically readable moisture sensor  
368 because it exhibited monotonically decreased length when equilibrated in different-humidity  
369 environment. For the preparation of the homochiral coil, ten plies of the hair fibers were  
370 twisted and folded in the middle, then wrapped around a mandrel to form a homochiral coil,  
371 next soaked in the ammonium thioglycollate solution (600 mM) for 15 min for chemical  
372 reduction, followed by soaking in the lauramine oxide solution (130 mM) for 10 min for  
373 chemical oxidation. The spring index was 13.89, the coil pitch was 3 mm, and the twist  
374 density was 1000 turns  $m^{-1}$ .

375 **Movie S2. A moisture-sensitive electrical switch made of the homochiral hair muscle.**

376 A homochiral hair coil was used as a hygromorph electrical switch for a smart alarm. In  
377 the dry air (20%), the light emitting diodes (LEDs) were connected to the electrical supply by  
378 the copper plate connected to the end of the hair coil muscle and lightened; when the hair coil  
379 was exposed to the water fog, the electric circuit was disconnected, and the LEDs went out.

380 For the preparation of the homochiral coil, ten plies of the twisted hair fibers were fold in  
381 the middle, then wrapped around a mandrel to form a homochiral coil, and they were soaked  
382 in the ammonium thioglycollate solution (600 mM) for 15 min for chemical reduction,  
383 followed by soaking in the lauramine oxide solution (130 mM) for 10 min for chemical  
384 oxidation. The spring index was 2.78, the coil pitch was 3 mm, the twist density was 1000  
385 turns  $m^{-1}$ , and the ambient humidity was ~20%.

386 **Movie S3. Crawling soft robot like caterpillar.**

387 Two individually parallel aligned coiled heterochiral hair muscles with reversible  
388 actuation were used for preparing a water fog-controlled crawling soft robot. Two heterochiral  
389 coil hair muscles were parallelly assembled on three feet with single orientation to make a  
390 crawling robot. The soft crawling robot can crawl forward on a flat surface by  
391 applying/removing the water fog.

392 **Movie S4. A smart hair style that getting short upon exposure to the water droplets and**  
393 **recovering the shape upon drying.**

394 To prepare the hair coils, ten plies of the twisted hair fibers were wrapped around a  
395 mandrel to form a homochiral coil, and then they were soaked in the ammonium  
396 thioglycollate solution (600 mM) for 15 min for chemical reduction, followed by soaking in  
397 the lauramine oxide solution (130 mM) for 10 min for chemical oxidation. The as-prepared

398 hair coils showed reversible hydromorphic actuation. The spring index was 15.8, the coil  
399 pitch was 3 mm, the twist density was 2000 turns  $m^{-1}$ , and the ambient humidity was 20%.

400 **Movie S5. Comparison of the torsional free reversible tensile artificial muscles made by**  
401 **the hair and the silkworm silk when exposing to hot water fog.**

402 The twisted hair fiber was folded in the middle, then heterchirally wrapped around a  
403 mandrel to form a homochiral coil, next soaked in the ammonium thioglycollate solution (600  
404 mM) for 15 min for chemical reduction, followed by soaking in the lauramine oxide solution  
405 (130 mM) for 10 min for chemical oxidation. Twisted silkworm fiber was wrapped around a  
406 mandrel to form a heterochiral coil, and then it was thermally annealed at 120 °C for 30 min.  
407 The spring index was 13.89, the coil pitch was 3 mm, and the twist density was 1000 turns  $m^{-1}$ .  
408 <sup>1</sup>.

410 **5. Supplementary References:**

- 411 (1) C. S. Haines, M. D. Lima, N. Li, G. M. Spinks, J. Foroughi, J. D. Madden, S. H. Kim, S.  
412 Fang, M. J. Andrade, F. Göktepe and et al. *Science* 2014, 343(6173), 868-872.
- 413 (2) T. Jia, Y. Wang, Y. Dou, Y. Li, M. Jung de Andrade, R. Wang, S. Fang, J. Li, Z. Yu R.  
414 Qiao and et al. *Adv. Funct. Mater.* 2019, 29(18), 1808241.
- 415 (3) H. Cheng, J. Liu, Y. Zhao, C. Hu, Z. Zhang, N. Chen, L. Jiang and L. Qu, *Angew. Chem.*  
416 *Int. Edit.* 2013, 52(40), 10482-10486.
- 417 (4) E. Steven, W. R. Saleh, V. Lebedev, S. F. Acquah, V. Laukhin, R. G. Alamo and J. S.  
418 Brooks, *Nat. Commun.* 2013, 4, 2435.
- 419 (5) S. H. Kim, C. H. Kwon, K. Park, T. J. Mun, X. Lepró, R. H. Baughman, G. M. Spinks and  
420 S. J. Kim, *Sci. Rep.* 2016, 6, 23016.
- 421 (6) I. Agnarsson, A. Dhinojwala, V. Sahni and T. A. Blackledge, *J. Exp. Biol.* 2009, 212(13),  
422 1990-1994.
